# Supplementary material for: Strain-tuned optoelectronic properties of hollow gallium sulphide microspheres
Source: Royal Society of Chemistry journal article supplement (doi:10.1039/c5nr05528h), 2015-01-01
Supplement: c5nr05528h1.pdf [file c5nr05528h1.pdf]

**Support Information:**

# Strain-tuned optoelectronic property of Hollow Gallium sulfides microsphere

*Yin Zhang, † Chen Chen, † C. Y. Liang, Z. W. Liu, Y. S. Li, and Renchao Che \**

Laboratory of Advanced Materials, Department of Materials Science, Collaborative  
Innovation Center of Chemistry for Energy Materials, Fudan University, Shanghai  
200438, China.

\* E-mail: rcche@fudan.edu.cn

† These authors contributed equally to this work.

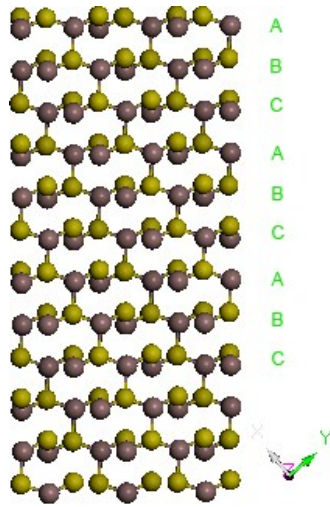

**Figure S1.** The crystal structure of  $\text{Ga}_2\text{S}_3$ . The stack sequence is ABC type along  $[110]$  axis.

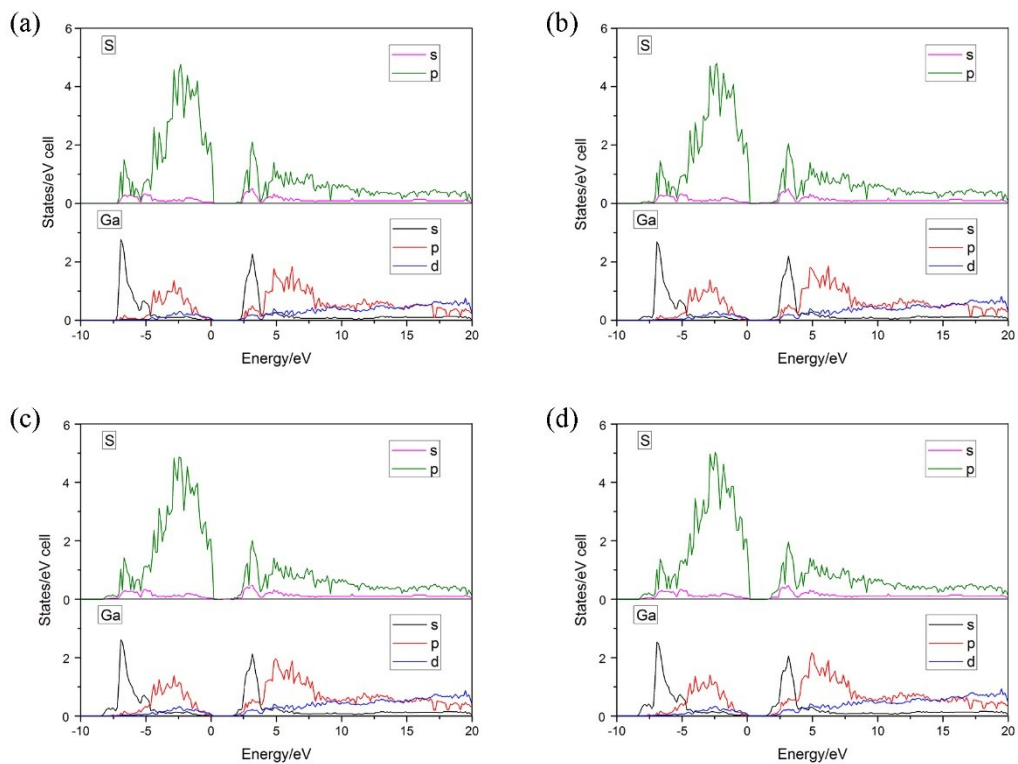

**Figure S2.** The calculated DOS of samples at (a) 950 °C, (b) 900 °C, (c) 850 °C, (d) 800°C.

With the increasing of growth temperature, the Ga-4p and S-3s state of the conduction regions shift towards the low energy area.
